# Supplementary material
Source: PubMed Central journal article supplement (PMC2695248)
Supplement: halms340859-supplement_2.pdf [file halms340859-supplement_2.pdf]

## Supplementary Table S1. Affymetrix microarray analysis

Expression profiles of four inflammatory HCA (IHCA) were compared to those of four non-tumour livers (NTL). Data are expressed as the mean-fold difference in gene expression in IHCA relative to NTL.

| Unigene ID | Ensembl Gene ID | Gene Symbol | Fold change ratio IHCA/NTL | P-value |
|------------|-----------------|-------------|----------------------------|---------|
| Hs.75498   | ENSG00000115009 | CCL20       | 219.8                      | 3.7E-04 |
| Hs.494337  | ENSG00000135052 | GOLPH2      | 129.0                      | 3.1E-05 |
| Hs.382202  | ENSG00000133048 | CHI3L1      | 103.3                      | 5.2E-04 |
| Hs.49407   | ENSG00000115386 | REG1A       | 100.4                      | 2.7E-04 |
| Hs.306834  | ENSG00000119782 | FKBP1B      | 84.5                       | 1.4E-04 |
| Hs.368632  | ENSG00000170214 | ADRA1B      | 57.9                       | 5.0E-06 |
| Hs.332053  | ENSG00000173432 | SAA1        | 33.1                       | 1.2E-04 |
| Hs.148909  | ENSG00000134121 | CHL1        | 30.2                       | 3.8E-04 |
| Hs.44532   | ENSG00000197402 | UBD         | 30.2                       | 4.0E-07 |
| Hs.131269  | ENSG00000118849 | RARRES1     | 29.9                       | 1.0E-03 |
| Hs.183114  | ENSG00000088756 | ARHGAP28    | 28.3                       | 0.0E+00 |
| Hs.13349   | ENSG00000163531 | NFASC       | 21.0                       | 5.7E-14 |
| Hs.21422   | ENSG00000091129 | NRCAM       | 20.2                       | 1.0E-07 |
| Hs.407882  | ENSG00000143450 | OAZ3        | 20.0                       | 1.7E-04 |
| Hs.407856  | ENSG00000164266 | SPINK1      | 17.4                       | 4.8E-04 |
| Hs.943     | ENSG00000008517 | NK4         | 16.8                       | 1.0E-04 |
| Hs.431099  | ENSG00000162366 | MAP17       | 16.4                       | 2.5E-06 |
| Hs.466804  | ENSG00000188257 | PLA2G2A     | 15.2                       | 1.0E-06 |
| Hs.238756  | ENSG00000177791 | MYOZ1       | 12.6                       | 0.0E+00 |
| Hs.208600  | ENSG00000160183 | TMPRSS3     | 11.7                       | 4.1E-04 |
| Hs.531682  | ENSG00000108602 | ALDH3A1     | 11.0                       | 6.7E-07 |
| Hs.546335  | ENSG00000138028 | CGREF1      | 10.2                       | 8.6E-06 |
| Hs.268785  | ENSG00000068366 | ACSL4       | 10.2                       | 7.5E-05 |
| Hs.50640   | ENSG00000185338 | SOCS1       | 9.8                        | 2.8E-04 |
| Hs.14415   | ENSG00000171311 | EXOSC1      | 9.8                        | 8.2E-09 |
| Hs.127799  | ENSG00000023445 | BIRC3       | 9.1                        | 2.7E-05 |
| Hs.440848  | ENSG00000110799 | VWF         | 8.9                        | 3.4E-04 |
| Hs.385861  | ENSG00000122550 | KLHL7       | 8.2                        | 1.4E-08 |
| Hs.546468  | ENSG00000179038 | LOC94431    | 8.1                        | 0.0E+00 |
| Hs.513316  | ENSG00000103199 | ZNF500      | 8.0                        | 4.0E-07 |
| Hs.2704    | ENSG00000176153 | GPX2        | 7.9                        | 7.5E-06 |
| Hs.435735  | ENSG00000138074 | SLC5A6      | 7.6                        | 5.0E-07 |
| Hs.76452   | ENSG00000132693 | CRP         | 7.3                        | 5.6E-04 |
| Hs.56319   | ENSG00000101441 | CST4        | 7.2                        | 3.6E-04 |
| Hs.522373  | ENSG00000148180 | GSN         | 7.2                        | 9.3E-06 |
| Hs.350321  | ENSG00000165731 | RET         | 7.1                        | 7.9E-06 |
| Hs.2303    | ENSG00000130427 | EPO         | 6.8                        | 2.1E-07 |
| Hs.404568  | ENSG00000107521 | HPS1        | 6.7                        | 4.7E-08 |
| Hs.95162   |                 | KCNQ1OT1    | 6.7                        | 1.2E-07 |
| Hs.486031  | ENSG00000112249 | ASCC3       | 6.2                        | 2.2E-05 |
| Hs.258326  | ENSG00000103528 | LOC51760    | 6.2                        | 4.4E-04 |
| Hs.190043  | ENSG00000130150 | MOSPD2      | 6.1                        | 2.0E-06 |
| Hs.493275  | ENSG00000137397 | TRIM31      | 6.0                        | 7.2E-07 |
| Hs.502759  | ENSG00000149541 | B3GAT3      | 6.0                        | 1.5E-07 |
| Hs.227817  | ENSG00000140379 | BCL2A1      | 5.9                        | 4.3E-04 |
| Hs.295626  | ENSG00000131355 | EMR3        | 5.7                        | 0.0E+00 |
| Hs.479766  | ENSG00000134851 | TPARL       | 5.6                        | 1.6E-04 |
| Hs.151220  | ENSG00000129116 | KIAA0992    | 5.5                        | 1.6E-04 |
| Hs.250281  | ENSG00000158296 | SLC13A3     | 5.2                        | 1.9E-06 |
| Hs.441783  | ENSG00000185567 | C14orf78    | 5.1                        | 1.8E-05 |
| Hs.293130  | ENSG00000112303 | VNN2        | 4.9                        | 1.7E-05 |
| Hs.130989  | ENSG00000111319 | SCNN1A      | 4.8                        | 9.5E-04 |
| Hs.437083  | ENSG00000114388 | TUSC4       | 4.7                        | 0.0E+00 |
| Hs.443160  | ENSG00000176920 | FUT2        | 4.6                        | 3.2E-04 |
| Hs.269128  | ENSG00000170145 | PPP2R1B     | 4.6                        | 1.9E-04 |
| Hs.352018  | ENSG00000168394 | TAP1        | 4.6                        | 7.3E-04 |
| Hs.36566   | ENSG00000106683 | LIMK1       | 4.5                        | 1.4E-05 |
| Hs.470457  | ENSG00000082438 | COBL1       | 4.4                        | 3.3E-04 |
| Hs.502328  | ENSG00000026508 | CD44        | 4.4                        | 8.9E-04 |
| Hs.129708  | ENSG00000125735 | TNFSF14     | 4.3                        | 5.9E-04 |
| Hs.517033  | ENSG00000198959 | TGM2        | 4.3                        | 2.1E-04 |
| Hs.8261    | ENSG00000171621 | SSB1        | 4.2                        | 9.6E-04 |
| Hs.533446  | ENSG00000164929 | BAALC       | 4.2                        | 4.9E-04 |
| Hs.155048  | ENSG00000187244 | LU          | 4.2                        | 2.0E-04 |
| Hs.380250  | ENSG00000163565 | IFI16       | 4.2                        | 3.2E-04 |
| Hs.271955  | ENSG00000145779 | TNFAIP8     | 4.1                        | 5.4E-04 |
| Hs.515126  | ENSG00000090339 | ICAM1       | 4.0                        | 2.0E-04 |
| Hs.221889  | ENSG00000060138 | CSDA        | 4.0                        | 2.1E-05 |
| Hs.190495  | ENSG00000136235 | GPNMB       | 4.0                        | 0.0E+00 |
| Hs.501280  | ENSG00000166033 | PRSS11      | 3.9                        | 3.6E-06 |
| Hs.268887  | ENSG00000164543 | STK17A      | 3.9                        | 8.0E-04 |
| Hs.521973  | ENSG00000101940 | WDR13       | 3.9                        | 5.2E-05 |
| Hs.386567  | ENSG00000162645 | GBP2        | 3.8                        | 1.2E-04 |
| Hs.351327  | ENSG00000140365 | COMMD4      | 3.8                        | 5.3E-15 |
| Hs.487046  | ENSG00000112096 | SOD2        | 3.8                        | 3.0E-04 |
| Hs.370725  | ENSG00000141447 | OSBPL1A     | 3.7                        | 5.8E-10 |
| Hs.154078  | ENSG00000129988 | LBP         | 3.7                        | 1.5E-04 |
| Hs.449009  | ENSG00000179403 | WARP        | 3.6                        | 6.0E-06 |
| Hs.464469  | ENSG00000101605 | MYOM1       | 3.6                        | 1.6E-04 |
| Hs.443687  | ENSG00000115641 | FHL2        | 3.6                        | 9.3E-04 |
| Hs.501778  | ENSG00000132274 | TRIM22      | 3.6                        | 3.8E-04 |
| Hs.144496  | ENSG00000112699 | GMDS        | 3.5                        | 1.1E-11 |
| Hs.463045  | ENSG00000108773 | GCN5L2      | 3.5                        | 3.2E-05 |
| Hs.437599  | ENSG00000110756 | HPS5        | 3.4                        | 6.4E-04 |
| Hs.18858   | ENSG00000105499 | PLA2G4C     | 3.4                        | 3.4E-07 |
| Hs.491805  | ENSG00000198846 | TOX         | 3.4                        | 9.2E-04 |
| Hs.4205    | ENSG00000074276 | PC-LKC      | 3.3                        | 7.3E-05 |
| Hs.79411   | ENSG00000117748 | RPA2        | 3.3                        | 5.0E-06 |
| Hs.125867  | ENSG00000196405 | EVL         | 3.3                        | 1.1E-15 |

|           |                 |               |     |         |
|-----------|-----------------|---------------|-----|---------|
| Hs.187284 | ENSG00000116183 | PAPPA2        | 3.3 | 1.4E-07 |
| Hs.462684 | ENSG00000173012 | DKFZp667M2411 | 3.2 | 3.0E-08 |
| Hs.208544 | ENSG00000135750 | KCNK1         | 3.2 | 5.9E-04 |
| Hs.2161   | ENSG00000197405 | C5R1          | 3.1 | 9.0E-04 |
| Hs.94865  | ENSG00000197905 | TEAD4         | 3.1 | 1.7E-04 |
| Hs.408061 | ENSG00000166900 | FABP5         | 3.1 | 8.0E-04 |
| Hs.248116 | ENSG00000173578 | XCR1          | 3.0 | 1.4E-11 |
| Hs.12211  | ENSG00000181830 | SLC35C1       | 3.0 | 9.2E-05 |
| Hs.61635  | ENSG00000164647 | STEAP         | 3.0 | 1.4E-04 |
| Hs.519884 | ENSG00000111846 | GCNT2         | 3.0 | 1.1E-10 |
| Hs.77961  | ENSG00000198638 | HLA-B         | 3.0 | 6.3E-04 |
| Hs.474737 | ENSG00000128284 | APOL3         | 3.0 | 1.5E-04 |
| Hs.138378 | ENSG00000196954 | CASP4         | 2.9 | 2.9E-05 |
| Hs.517070 | ENSG00000124107 | SLP1          | 2.9 | 3.5E-05 |
| Hs.194754 | ENSG00000117597 | MGC29875      | 2.9 | 4.9E-04 |
| Hs.27695  | ENSG00000101871 | MID1          | 2.9 | 4.3E-04 |
| Hs.387856 | ENSG00000100154 | KIAA1043      | 2.9 | 9.8E-05 |
| Hs.129944 | ENSG00000164283 | ESM1          | 2.9 | 9.9E-04 |
| Hs.172684 | ENSG00000168899 | VAMP5         | 2.9 | 8.8E-04 |
| Hs.513141 | ENSG00000182054 | IDH2          | 2.8 | 5.8E-04 |
| Hs.347270 | ENSG00000168384 | HLA-DPA1      | 2.8 | 6.3E-08 |
| Hs.512152 | ENSG00000187888 | HLA-G         | 2.8 | 8.9E-04 |
| Hs.463059 | ENSG00000168610 | STAT3         | 2.8 | 2.8E-04 |
| Hs.115838 | ENSG00000103534 | TMC5          | 2.8 | 4.0E-07 |
| Hs.381167 | ENSG0000021355  | SERPINB1      | 2.8 | 7.4E-04 |
| Hs.440168 | ENSG00000172348 | DSCR1L1       | 2.8 | 7.9E-08 |
| Hs.529493 | ENSG00000204657 | OR2H2         | 2.7 | 6.8E-04 |
| Hs.519972 | ENSG00000137403 | HLA-F         | 2.7 | 5.0E-04 |
| Hs.304475 | ENSG0000043462  | LCP2          | 2.7 | 2.4E-07 |
| Hs.50649  | ENSG00000115129 | TP53I3        | 2.7 | 1.8E-04 |
| Hs.2131   | ENSG00000166148 | AVPR1A        | 2.7 | 2.0E-04 |
| Hs.371021 | ENSG00000162511 | LAPTM5        | 2.7 | 4.5E-11 |
| Hs.514038 | ENSG00000132589 | FLOT2         | 2.7 | 1.9E-04 |
| Hs.74120  | ENSG00000148671 | C10orf116     | 2.7 | 5.8E-07 |
| Hs.471783 | ENSG00000132329 | RAMP1         | 2.7 | 3.9E-06 |
| Hs.459049 | ENSG00000136371 | MTHFS         | 2.7 | 7.3E-05 |
| Hs.107125 | ENSG00000130300 | PLVAP         | 2.7 | 4.7E-04 |
| Hs.513488 | ENSG0000013364  | MVP           | 2.6 | 1.1E-04 |
| Hs.12956  | ENSG00000108392 | TAX1BP3       | 2.6 | 7.6E-05 |
| Hs.352548 | ENSG00000126246 | FLJ22573      | 2.6 | 1.4E-04 |
| Hs.458425 | ENSG00000182782 | GPR109B       | 2.6 | 5.4E-04 |
| Hs.467101 | ENSG00000130529 | TRPM4         | 2.6 | 2.8E-04 |
| Hs.534125 | ENSG00000198479 | HLA-C         | 2.6 | 9.4E-04 |
| Hs.351279 | ENSG00000124546 | HLA-DMA       | 2.6 | 8.2E-04 |
| Hs.482017 | ENSG00000197147 | TA-LRRP       | 2.6 | 6.4E-06 |
| Hs.534392 | ENSG00000100196 | KDELR3        | 2.6 | 1.4E-04 |
| Hs.67928  | ENSG00000163435 | ELF3          | 2.6 | 5.0E-04 |
| Hs.520414 | ENSG0000027697  | IFNGR1        | 2.6 | 3.0E-04 |
| Hs.530988 | ENSG00000132950 | ZNF237        | 2.6 | 1.7E-04 |
| Hs.302963 | ENSG00000159674 | SPON2         | 2.6 | 3.4E-04 |
| Hs.518055 | ENSG00000144749 | LRIG1         | 2.6 | 3.1E-04 |
| Hs.123352 | ENSG00000175354 | PTPN2         | 2.6 | 5.8E-04 |
| Hs.131704 | ENSG00000099250 | NRP1          | 2.5 | 5.5E-11 |
| Hs.459538 | ENSG00000184254 | ALDH1A3       | 2.5 | 8.4E-06 |
| Hs.474596 | ENSG00000182541 | LIMK2         | 2.5 | 4.2E-03 |
| Hs.489615 | ENSG00000105835 | PBEF1         | 2.5 | 9.8E-04 |
| Hs.278430 | ENSG00000168482 | CYP21A2       | 2.5 | 6.8E-06 |
| Hs.409934 | ENSG00000206237 | HLA-DQB1      | 2.5 | 2.3E-06 |
| Hs.520714 | ENSG00000086300 | SNX10         | 2.5 | 3.5E-06 |
| Hs.444301 | ENSG00000161280 | FLJ10986      | 2.5 | 9.9E-04 |
| Hs.509554 | ENSG00000100644 | HIF1A         | 2.5 | 6.8E-04 |
| Hs.387255 | ENSG00000140632 | N-PAC         | 2.5 | 3.0E-04 |
| Hs.511093 | ENSG00000137804 | NUSAP1        | 2.5 | 4.8E-04 |
| Hs.519033 | ENSG00000137462 | TLR2          | 2.5 | 4.8E-04 |
| Hs.368623 | ENSG00000152229 | PSTPIP2       | 2.5 | 2.7E-04 |
| Hs.80658  | ENSG00000175567 | UCP2          | 2.5 | 6.0E-04 |
| Hs.167741 | ENSG00000111801 | BTN3A3        | 2.4 | 3.7E-04 |
| Hs.438419 | ENSG00000198246 | SLC29A3       | 2.4 | 9.4E-08 |
| Hs.246381 | ENSG00000129226 | CD68          | 2.4 | 2.6E-10 |
| Hs.491143 | ENSG00000104760 | FGL1          | 2.4 | 3.5E-04 |
| Hs.301865 | ENSG00000080166 | DCT           | 2.4 | 7.2E-12 |
| Hs.388297 | ENSG00000156831 | FLJ32440      | 2.4 | 1.9E-06 |
| Hs.515536 | ENSG00000126458 | RRAS          | 2.4 | 1.9E-09 |
| Hs.181301 | ENSG00000163131 | CTSS          | 2.4 | 8.1E-07 |
| Hs.323878 | ENSG00000115902 | SLC1A4        | 2.4 | 8.9E-04 |
| Hs.17466  | ENSG00000133321 | RARRES3       | 2.4 | 1.4E-07 |
| Hs.512633 | ENSG00000186652 | PRG2          | 2.4 | 8.0E-04 |
| Hs.525392 | ENSG00000054654 | SYNE2         | 2.4 | 7.8E-04 |
| Hs.7972   | ENSG00000018189 | RIPX          | 2.4 | 5.9E-04 |
| Hs.369201 | ENSG00000183087 | GAS6          | 2.4 | 1.2E-03 |
| Hs.444451 | ENSG00000091436 | ZAK           | 2.3 | 2.8E-04 |
| Hs.163113 | ENSG00000178927 | MGC4368       | 2.3 | 2.7E-04 |
| Hs.102471 | ENSG00000112419 | PHACTR2       | 2.3 | 4.9E-07 |
| Hs.28988  | ENSG00000118990 | GLRX          | 2.3 | 1.4E-04 |
| Hs.400740 | ENSG00000119383 | PPP2R4        | 2.3 | 4.9E-04 |
| Hs.520049 | ENSG00000196126 | HLA-DRB1      | 2.3 | 2.8E-06 |
| Hs.530077 | ENSG00000105854 | PON2          | 2.3 | 1.0E-04 |
| Hs.201641 | ENSG00000176788 | BASP1         | 2.3 | 1.7E-07 |
| Hs.509765 | ENSG00000072110 | ACTN1         | 2.3 | 3.2E-04 |
| Hs.154654 | ENSG00000138061 | CYP11B1       | 2.3 | 7.2E-04 |
| Hs.301921 | ENSG00000163823 | CCR1          | 2.3 | 5.0E-06 |
| Hs.434253 | ENSG00000148120 | C9orf3        | 2.3 | 5.6E-04 |
| Hs.522684 | ENSG00000147130 | ZNF261        | 2.3 | 1.6E-08 |
| Hs.128686 | ENSG00000070081 | NUCB2         | 2.3 | 9.3E-04 |
| Hs.99528  | ENSG00000168461 | RAB31         | 2.3 | 2.3E-07 |
| Hs.495219 | ENSG00000148334 | PTGES2        | 2.3 | 1.3E-09 |
| Hs.309602 | ENSG00000137384 | TRIM15        | 2.3 | 1.0E-03 |
| Hs.522605 | ENSG00000165175 | MID1IP1       | 2.3 | 1.2E-06 |
| Hs.446079 | ENSG00000108582 | CPD           | 2.3 | 3.8E-04 |
| Hs.1706   | ENSG00000092098 | ISGF3G        | 2.2 | 7.4E-07 |

|           |                 |            |      |         |
|-----------|-----------------|------------|------|---------|
| Hs.488143 | ENSG00000106605 | BLVRA      | 2.2  | 2.7E-04 |
| Hs.482411 | ENSG00000198605 | SMA4       | 2.2  | 2.6E-03 |
| Hs.386793 | ENSG00000157566 | GPX3       | 2.2  | 1.8E-04 |
| Hs.334587 | ENSG00000157110 | RBPMS      | 2.2  | 6.3E-08 |
| Hs.433529 | ENSG00000142534 | RPS11      | 2.2  | 1.2E-04 |
| Hs.89890  | ENSG00000173599 | PC         | 2.2  | 3.2E-04 |
| Hs.173288 | ENSG00000198730 | SH2BP1     | 2.2  | 1.3E-05 |
| Hs.433300 | ENSG00000158869 | FCER1G     | 2.2  | 2.9E-06 |
| Hs.355264 | ENSG00000008283 | CYB561     | 2.2  | 4.5E-04 |
| Hs.280987 | ENSG00000113318 | MSH3       | 2.2  | 7.1E-08 |
| Hs.446574 | ENSG00000034510 | TMSB10     | 2.2  | 1.4E-09 |
| Hs.458414 | ENSG00000185885 | IFITM1     | 2.2  | 1.1E-09 |
| Hs.440932 | ENSG00000184640 | 40057      | 2.2  | 1.3E-07 |
| Hs.143703 | ENSG00000103966 | EHD4       | 2.2  | 5.1E-06 |
| Hs.8904   | ENSG00000155659 | VSIG4      | 2.2  | 4.0E-06 |
| Hs.489284 | ENSG00000130429 | ARPC1B     | 2.2  | 9.1E-04 |
| Hs.175473 | ENSG00000106992 | AK1        | 2.2  | 1.3E-04 |
| Hs.438695 | ENSG00000134285 | FKBP11     | 2.2  | 2.1E-07 |
| Hs.520048 | ENSG00000168423 | HLA-DRA    | 2.2  | 1.4E-07 |
| Hs.107393 | ENSG00000080822 | C3orf4     | 2.2  | 3.6E-04 |
| Hs.300834 | ENSG00000143641 | GALNT2     | 2.2  | 3.8E-04 |
| Hs.381081 | ENSG00000112082 | PSMB9      | 2.2  | 8.8E-04 |
| Hs.508716 | ENSG00000134871 | COL4A2     | 2.2  | 4.8E-07 |
| Hs.118110 | ENSG00000130303 | BST2       | 2.2  | 7.3E-04 |
| Hs.180062 | ENSG00000168396 | PSMB8      | 2.2  | 7.2E-05 |
| Hs.211600 | ENSG00000118503 | TNFALP3    | 2.2  | 6.2E-04 |
| Hs.350899 | ENSG00000162909 | CAPN2      | 2.2  | 1.4E-06 |
| Hs.513457 | ENSG00000077238 | IL4R       | 2.2  | 2.7E-05 |
| Hs.73090  | ENSG00000077150 | NFKB2      | 2.2  | 1.0E-04 |
| Hs.546248 | ENSG00000117984 | CTSD       | 2.1  | 3.2E-05 |
| Hs.10649  | ENSG00000130775 | C1orf38    | 2.1  | 7.7E-06 |
| Hs.466791 | ENSG00000167601 | AXL        | 2.1  | 1.0E-05 |
| Hs.75431  | ENSG00000162551 | ALPL       | 2.1  | 2.4E-04 |
| Hs.549038 | ENSG00000197499 | HLA-A      | 2.1  | 5.8E-04 |
| Hs.367992 | ENSG00000141401 | IMPA2      | 2.1  | 9.3E-07 |
| Hs.148178 | ENSG00000076864 | RAP1GA1    | 2.1  | 1.9E-04 |
| Hs.508644 | ENSG00000134884 | FLJ10154   | 2.1  | 2.4E-04 |
| Hs.511397 | ENSG00000076706 | MCAM       | 2.1  | 1.5E-05 |
| Hs.81134  | ENSG00000136689 | IL1RN      | 2.1  | 1.8E-06 |
| Hs.522632 | ENSG00000102265 | TIMP1      | 2.1  | 6.2E-07 |
| Hs.11923  | ENSG00000058799 | DJ167A19.1 | 2.1  | 4.6E-04 |
| Hs.29106  | ENSG00000112679 | DUSP22     | 2.1  | 4.6E-04 |
| Hs.436873 | ENSG00000138448 | ITGAV      | 2.1  | 2.4E-08 |
| Hs.76716  | ENSG00000162267 | ITIH3      | 2.1  | 8.6E-07 |
| Hs.381008 | ENSG00000137361 | HLA-E      | 2.1  | 4.9E-06 |
| Hs.511605 | ENSG00000182718 | ANXA2      | 2.1  | 4.7E-06 |
| Hs.517543 | ENSG00000100029 | PES1       | 2.1  | 8.9E-04 |
| Hs.484047 | ENSG00000113645 | KIBRA      | 2.0  | 4.5E-04 |
| Hs.369397 | ENSG00000120708 | TGFB1      | 2.0  | 1.4E-04 |
| Hs.186486 | ENSG00000197442 | MAP3K5     | 2.0  | 5.6E-08 |
| Hs.376046 | ENSG00000186470 | BTN3A2     | 2.0  | 1.1E-04 |
| Hs.467701 | ENSG00000115758 | ODC1       | 2.0  | 1.6E-06 |
| Hs.50842  | ENSG00000068079 | IFI35      | 2.0  | 7.5E-08 |
| Hs.13640  | ENSG00000169855 | ROBO1      | 2.0  | 5.3E-05 |
| Hs.404289 | ENSG00000136842 | TMOD1      | 2.0  | 8.6E-04 |
| Hs.133397 | ENSG00000091409 | ITGA6      | 2.0  | 1.7E-07 |
| Hs.159430 | ENSG00000075420 | FNDC3B     | 2.0  | 3.0E-06 |
| Hs.166120 | ENSG00000185507 | IRF7       | 2.0  | 2.3E-06 |
| Hs.523696 | ENSG00000110042 | DTX4       | 2.0  | 1.2E-04 |
| Hs.491148 | ENSG00000078674 | PCM1       | 2.0  | 3.2E-06 |
| Hs.81791  | ENSG00000164761 | TNFRSF11B  | 2.0  | 5.8E-04 |
| Hs.404119 | ENSG00000104522 | TSTA3      | 2.0  | 6.5E-04 |
| Hs.23131  | ENSG00000140859 | KIFC3      | 2.0  | 2.9E-04 |
| Hs.421194 | ENSG00000169902 | TPST1      | 2.0  | 4.1E-04 |
| Hs.522412 | ENSG00000171159 | C9orf16    | 2.0  | 9.3E-04 |
| Hs.523852 | ENSG00000110092 | CCND1      | 2.0  | 1.1E-04 |
| Hs.517240 | ENSG00000159128 | IFNGR2     | 2.0  | 4.6E-04 |
| Hs.491767 | ENSG00000147507 | LYN        | 1.9  | 4.8E-06 |
| Hs.140452 | ENSG00000105355 | M6PRBP1    | 1.9  | 2.9E-04 |
| Hs.535499 | ENSG00000131759 | RARA       | 1.9  | 5.1E-07 |
| Hs.343522 | ENSG00000058668 | ATP2B4     | 1.9  | 6.5E-04 |
| Hs.450972 | ENSG00000102804 | TGFB14     | 1.9  | 9.2E-04 |
| Hs.517168 | ENSG00000117063 | TAGLN2     | 1.9  | 5.6E-06 |
| Hs.14601  | ENSG00000180353 | HCLS1      | 1.9  | 1.1E-05 |
| Hs.435765 | ENSG00000138792 | ENPEP      | 1.9  | 6.1E-06 |
| Hs.459855 | ENSG00000140650 | PMM2       | 1.9  | 5.0E-04 |
| Hs.272011 | ENSG00000086062 | B4GALT1    | 1.9  | 9.8E-06 |
| Hs.289092 | ENSG00000103187 | COTL1      | 1.9  | 1.5E-06 |
| Hs.489033 | ENSG00000085563 | ABCB1      | 1.9  | 5.0E-04 |
| Hs.278573 | ENSG00000085063 | CD59       | 1.9  | 5.8E-04 |
| Hs.282594 | ENSG00000134389 | CFHL5      | 1.9  | 8.0E-04 |
| Hs.35947  | ENSG00000129071 | MBD4       | 1.9  | 1.3E-05 |
| Hs.405667 | ENSG00000172116 | CD8B1      | 1.9  | 9.5E-06 |
| Hs.408909 | ENSG00000113384 | GOLPH3     | 1.9  | 5.8E-05 |
| Hs.123232 | ENSG00000140025 | C14orf143  | 1.9  | 1.0E-05 |
| Hs.454534 | ENSG00000105698 | USF2       | 1.9  | 6.9E-04 |
| Hs.517666 | ENSG00000100243 | DIA1       | 1.9  | 3.3E-07 |
| Hs.149239 | ENSG00000125266 | EFNB2      | 1.9  | 9.6E-06 |
| Hs.518301 | ENSG00000177311 | FLJ35036   | 1.9  | 8.8E-04 |
| Hs.369762 | ENSG00000176890 | TYMS       | 1.9  | 4.4E-04 |
| Hs.87752  | ENSG00000147065 | MSN        | 1.8  | 1.4E-07 |
| Hs.515169 | ENSG00000104907 | FLJ20244   | 1.8  | 1.4E-05 |
| Hs.146447 | ENSG00000166147 | FBN1       | 1.8  | 4.8E-06 |
| Hs.473256 | ENSG00000130702 | LAMA5      | 1.8  | 7.8E-06 |
| Hs.498173 | ENSG00000166311 | SMPD1      | 1.8  | 5.8E-05 |
| Hs.534847 | ENSG00000166308 | C4A        | 1.7  | 1.1E-06 |
| Hs.171142 | ENSG00000108381 | ASPA       | -1.5 | 8.3E-06 |
| Hs.269180 | ENSG00000095203 | EPB41L4B   | -1.6 | 9.4E-06 |
| Hs.487925 | ENSG00000178104 | PDE4DIP    | -1.7 | 2.5E-07 |
| Hs.180919 | ENSG00000115738 | ID2        | -1.8 | 1.3E-06 |

|           |                 |           |      |         |
|-----------|-----------------|-----------|------|---------|
| Hs.499674 | ENSG00000165471 | MBL2      | -1.8 | 3.0E-06 |
| Hs.552573 | ENSG00000164850 | GPR30     | -1.8 | 2.5E-04 |
| Hs.235390 | ENSG00000121413 | FLJ12895  | -1.9 | 9.4E-04 |
| Hs.300863 | ENSG00000185513 | L3MBTL    | -1.9 | 9.8E-03 |
| Hs.318894 | ENSG00000112414 | GPR126    | -1.9 | 4.8E-04 |
| Hs.368243 | ENSG00000023839 | ABCC2     | -1.9 | 7.8E-04 |
| Hs.343911 | ENSG00000149547 | EI24      | -1.9 | 3.3E-08 |
| Hs.164226 | ENSG00000137801 | THBS1     | -1.9 | 1.6E-08 |
| Hs.250    | ENSG00000158125 | XDH       | -1.9 | 7.9E-05 |
| Hs.271264 | ENSG00000001084 | GCLC      | -1.9 | 8.5E-04 |
| Hs.546303 | ENSG00000100380 | ST13      | -1.9 | 1.0E-08 |
| Hs.233220 | ENSG00000197114 | FLJ20406  | -1.9 | 7.6E-06 |
| Hs.287749 | ENSG00000109929 | SC5DL     | -2.0 | 1.3E-06 |
| Hs.520710 | ENSG00000128607 | KIAA0265  | -2.0 | 2.6E-04 |
| Hs.11900  | ENSG00000197114 | ZGPAT     | -2.0 | 9.4E-06 |
| Hs.184507 | ENSG00000198338 | ZG16      | -2.0 | 9.1E-04 |
| Hs.448520 | ENSG00000003989 | SLC7A2    | -2.0 | 5.6E-04 |
| Hs.471508 | ENSG00000169047 | IRS1      | -2.0 | 7.0E-06 |
| Hs.251415 | ENSG00000181150 | DIO1      | -2.0 | 5.7E-04 |
| Hs.427202 | ENSG00000118271 | TTR       | -2.0 | 1.2E-04 |
| Hs.161220 | ENSG00000139597 | CGO18     | -2.0 | 6.9E-04 |
| Hs.149252 | ENSG00000021826 | CPS1      | -2.0 | 9.5E-04 |
| Hs.169378 | ENSG00000107186 | MPDZ      | -2.0 | 1.4E-05 |
| Hs.77293  | ENSG00000179833 | SERTAD2   | -2.0 | 7.8E-04 |
| Hs.94896  | ENSG00000096092 | TMEM14A   | -2.1 | 1.9E-06 |
| Hs.5243   | ENSG00000114023 | E2IG5     | -2.1 | 8.8E-04 |
| Hs.408790 | ENSG00000185808 | DSCR5     | -2.1 | 1.4E-05 |
| Hs.132225 | ENSG00000145675 | PIK3R1    | -2.1 | 8.6E-04 |
| Hs.335139 | ENSG00000136636 | KCTD3     | -2.1 | 5.2E-06 |
| Hs.496459 | ENSG00000143337 | LAP1B     | -2.1 | 5.4E-06 |
| Hs.223858 | ENSG00000123454 | DBH       | -2.1 | 2.4E-07 |
| Hs.495912 | ENSG00000198947 | DMD       | -2.1 | 5.4E-06 |
| Hs.107003 | ENSG00000100814 | CCNB1IP1  | -2.1 | 7.9E-04 |
| Hs.144795 | ENSG00000156113 | KCNMA1    | -2.1 | 1.5E-05 |
| Hs.7303   | ENSG00000144852 | NR1I2     | -2.1 | 1.1E-05 |
| Hs.552    | ENSG00000145545 | SRD5A1    | -2.1 | 2.9E-12 |
| Hs.502176 | ENSG00000205213 | LGR4      | -2.1 | 1.0E-05 |
| Hs.12393  | ENSG00000088451 | TGDS      | -2.1 | 6.7E-04 |
| Hs.546304 | ENSG00000197165 | SULT1A2   | -2.1 | 5.7E-04 |
| Hs.460587 | ENSG00000132207 | SULT1A3   | -2.1 | 1.3E-08 |
| Hs.102308 | ENSG00000121361 | KCNJ8     | -2.1 | 1.2E-05 |
| Hs.325404 | ENSG00000171759 | PAH       | -2.2 | 7.0E-05 |
| Hs.150557 | ENSG00000119138 | KLF9      | -2.2 | 9.5E-04 |
| Hs.371763 | ENSG00000176201 | GBA3      | -2.2 | 3.4E-05 |
| Hs.80409  | ENSG00000116717 | GADD45A   | -2.2 | 6.0E-11 |
| Hs.268700 | ENSG00000172828 | FLJ21736  | -2.2 | 3.7E-06 |
| Hs.145442 | ENSG00000169032 | MAP2K1    | -2.2 | 7.4E-04 |
| Hs.156540 | ENSG00000166922 | SGNE1     | -2.2 | 4.8E-04 |
| Hs.145384 | ENSG00000149124 | GLYAT     | -2.3 | 6.5E-05 |
| Hs.409368 | ENSG00000147654 | EBAG9     | -2.3 | 1.5E-04 |
| Hs.407190 | ENSG00000096060 | FKBP5     | -2.3 | 5.2E-06 |
| Hs.142    | ENSG00000196502 | SULT1A1   | -2.3 | 1.2E-04 |
| Hs.525205 | ENSG00000165795 | NDRG2     | -2.3 | 1.9E-04 |
| Hs.326035 | ENSG00000120738 | EGR1      | -2.3 | 4.7E-11 |
| Hs.500761 | ENSG00000141526 | SLC16A3   | -2.3 | 1.4E-08 |
| Hs.83190  | ENSG00000169710 | FASN      | -2.3 | 1.1E-11 |
| Hs.232054 | ENSG00000142494 | FLJ10847  | -2.3 | 2.6E-04 |
| Hs.478673 | ENSG00000196083 | IL1RAP    | -2.3 | 2.7E-06 |
| Hs.118681 | ENSG00000065361 | ERBB3     | -2.3 | 1.2E-06 |
| Hs.160786 | ENSG00000130707 | ASS       | -2.4 | 7.2E-04 |
| Hs.465337 | ENSG00000081913 | PLEKHE1   | -2.4 | 5.9E-05 |
| Hs.7921   |                 | LOC221362 | -2.4 | 2.9E-04 |
| Hs.160562 | ENSG00000017427 | IGF1      | -2.4 | 8.7E-04 |
| Hs.136885 | ENSG00000127870 | RNF6      | -2.4 | 7.1E-08 |
| Hs.80756  | ENSG00000145692 | BHMT      | -2.4 | 6.6E-04 |
| Hs.327179 | ENSG00000124564 | SLC17A3   | -2.4 | 6.1E-04 |
| Hs.8361   | ENSG00000182704 | TSK       | -2.4 | 2.8E-08 |
| Hs.483067 | ENSG00000134986 | C5orf13   | -2.5 | 5.3E-08 |
| Hs.75231  | ENSG00000155380 | SLC16A1   | -2.5 | 3.4E-04 |
| Hs.444488 | ENSG00000072080 | SPP2      | -2.5 | 1.5E-07 |
| Hs.487296 | ENSG00000092621 | PHGDH     | -2.5 | 4.6E-04 |
| Hs.97270  | ENSG00000138640 | FAM13A1   | -2.6 | 6.3E-04 |
| Hs.144879 | ENSG00000130829 | DUSP9     | -2.6 | 1.4E-04 |
| Hs.209128 | ENSG00000002822 | MAD1L1    | -2.6 | 3.1E-06 |
| Hs.510334 | ENSG00000188488 | SERPINA5  | -2.6 | 8.2E-04 |
| Hs.149032 | ENSG00000196455 | PIK3R4    | -2.6 | 5.9E-04 |
| Hs.480218 | ENSG00000118777 | ABCG2     | -2.6 | 1.8E-04 |
| Hs.25155  | ENSG00000173848 | NET1      | -2.6 | 2.4E-06 |
| Hs.443874 | ENSG00000157103 | SLC6A1    | -2.7 | 6.1E-04 |
| Hs.91747  | ENSG00000070087 | PFN2      | -2.7 | 8.3E-05 |
| Hs.126906 | ENSG00000049883 | PTCD2     | -2.7 | 9.4E-04 |
| Hs.111944 | ENSG00000160870 | CYP3A7    | -2.7 | 8.2E-04 |
| Hs.159628 | ENSG00000100665 | SERPINA4  | -2.8 | 6.2E-04 |
| Hs.143261 | ENSG00000092529 | CAPN3     | -2.8 | 9.4E-07 |
| Hs.501624 | ENSG00000185187 | SIGIRR    | -2.8 | 8.7E-04 |
| Hs.155097 | ENSG00000104267 | CA2       | -2.8 | 5.2E-05 |
| Hs.284712 | ENSG00000136881 | BAAT      | -2.9 | 2.2E-04 |
| Hs.282624 | ENSG00000138109 | CYP2C9    | -2.9 | 3.0E-12 |
| Hs.25647  | ENSG00000170345 | FOS       | -2.9 | 6.3E-12 |
| Hs.528295 | ENSG00000008311 | AASS      | -2.9 | 1.3E-08 |
| Hs.407966 | ENSG00000108479 | GALK1     | -3.0 | 7.7E-12 |
| Hs.494261 | ENSG00000135069 | PSAT1     | -3.0 | 6.0E-04 |
| Hs.8944   | ENSG00000163710 | PCOLCE2   | -3.0 | 5.9E-04 |
| Hs.302742 | ENSG00000198743 | MRPS6     | -3.1 | 4.6E-05 |
| Hs.205816 | ENSG00000124568 | SLC17A1   | -3.1 | 6.2E-04 |
| Hs.444870 | ENSG00000115942 | ORC2L     | -3.1 | 2.0E-04 |
| Hs.306220 | ENSG00000021461 | CYP3A43   | -3.2 | 9.8E-04 |
| Hs.212606 | ENSG00000135423 | GLS2      | -3.3 | 9.1E-15 |
| Hs.197043 | ENSG00000117643 | MAN1C1    | -3.4 | 1.5E-10 |
| Hs.160976 | ENSG00000005187 | SAH       | -3.4 | 6.4E-15 |

|           |                 |         |       |         |
|-----------|-----------------|---------|-------|---------|
| Hs.30246  | ENSG00000117479 | SLC19A2 | -3.4  | 4.8E-04 |
| Hs.524085 | ENSG00000036672 | USP2    | -3.5  | 6.6E-06 |
| Hs.203717 | ENSG00000115414 | FN1     | -3.5  | 9.4E-04 |
| Hs.144845 | ENSG00000129151 | BBOX1   | -3.5  | 1.0E-11 |
| Hs.479898 | ENSG00000109193 | SULT1E1 | -3.5  | 5.9E-04 |
| Hs.439056 | ENSG00000198470 | CYP2A6  | -3.9  | 0.0E+00 |
| Hs.485572 | ENSG00000120833 | SOCS2   | -4.3  | 1.9E-12 |
| Hs.463375 | ENSG00000198740 | ZNF652  | -4.4  | 3.5E-06 |
| Hs.839    | ENSG00000099769 | IGFALS  | -4.4  | 2.9E-04 |
| Hs.124112 | ENSG00000167165 | UGT1A6  | -4.4  | 2.5E-03 |
| Hs.505662 | ENSG00000135447 | PPP1R1A | -4.5  | 0.0E+00 |
| Hs.72912  | ENSG00000140465 | CYP1A1  | -4.7  | 2.6E-14 |
| Hs.87889  | ENSG00000100697 | DICER1  | -4.9  | 1.9E-03 |
| Hs.127648 | ENSG00000173930 | SLCO4C1 | -5.0  | 8.9E-04 |
| Hs.144914 | ENSG00000124713 | GNMT    | -5.3  | 6.3E-04 |
| Hs.169948 | ENSG00000177272 | KCNA3   | -5.4  | 2.0E-14 |
| Hs.418167 | ENSG00000163631 | ALB     | -5.7  | 3.0E-11 |
| Hs.150595 | ENSG00000095596 | CYP26A1 | -5.7  | 1.2E-05 |
| Hs.75678  | ENSG00000125740 | FOSB    | -5.9  | 3.6E-14 |
| Hs.127826 | ENSG00000187266 | EPOR    | -5.9  | 2.2E-06 |
| Hs.224171 | ENSG00000108515 | ENO3    | -6.1  | 0.0E+00 |
| Hs.534364 | ENSG00000127831 | VIL1    | -6.6  | 4.4E-16 |
| Hs.523332 | ENSG00000065154 | OAT     | -6.8  | 2.7E-04 |
| Hs.272499 | ENSG00000100867 | DHRS2   | -7.0  | 1.6E-11 |
| Hs.107474 | ENSG00000138386 | NAB1    | -8.5  | 1.6E-04 |
| Hs.489786 | ENSG00000001626 | CFTR    | -9.2  | 8.6E-06 |
| Hs.98280  | ENSG00000080709 | KCNN2   | -11.3 | 5.7E-05 |
| Hs.351306 | ENSG00000168679 | SLC16A4 | -14.9 | 1.6E-04 |
| Hs.724    | ENSG00000126351 | THRA    | -17.3 | 1.0E-07 |
| Hs.234775 | ENSG00000171119 | NRTN    | -19.4 | 6.7E-10 |
| Hs.307734 | ENSG00000196549 | MME     | -20.4 | 3.3E-05 |
| Hs.282409 | ENSG00000165841 | CYP2C19 | -21.6 | 1.8E-05 |
