# Supplementary material
Source: PubMed Central journal article supplement (PMC2695248)
Supplement: halms340859-supplement_3.pdf [file halms340859-supplement_3.pdf]

## Supplementary Table S2. Gene Ontology (GO) analysis

Liste of GO terms significantly enriched in genes over-expressed in inflammatory HCA, obtained using the web-based tool GOTree Machine and the hypergeometric test. GO terms related to inflammation and immune response are indicated in red.

**O:** Observed gene number in the GO category (referred to genes over-expressed in inflammatory HCA compared to non-tumour livers)

**E:** Expected gene number in the GO category (referred to the whole content of the HG-U133A Affymetrix array)

**R:** Ratio of enrichment for the GO category (O/E)

**P-value:** Significance of enrichment for the GO category

GO categories were considered significantly enriched when the *P*-value was less than 0.01

|                                                                                           | O  | E     | R     | P-value |
|-------------------------------------------------------------------------------------------|----|-------|-------|---------|
| <b>In biological process</b>                                                              |    |       |       |         |
| <b>protein kinase cascade</b>                                                             | 13 | 5.5   | 2.36  | 3E-03   |
| <b>JAK-STAT cascade</b>                                                                   | 5  | 0.66  | 7.58  | 4E-04   |
| regulation of JAK-STAT cascade                                                            | 4  | 0.17  | 23.53 | 1E-05   |
| negative regulation of JAK-STAT cascade                                                   | 2  | 0.1   | 20    | 3E-03   |
| negative regulation of tyrosine phosphorylation of STAT protein                           | 2  | 0.1   | 20    | 3E-03   |
| negative regulation of tyrosine phosphorylation of Stat3 protein                          | 2  | 0.1   | 20    | 3E-03   |
| positive regulation of JAK-STAT cascade                                                   | 2  | 0.07  | 28.57 | 2E-03   |
| positive regulation of tyrosine phosphorylation of STAT protein                           | 2  | 0.07  | 28.57 | 2E-03   |
| regulation of tyrosine phosphorylation of STAT protein                                    | 4  | 0.17  | 23.53 | 1E-05   |
| regulation of tyrosine phosphorylation of Stat3 protein                                   | 2  | 0.12  | 16.67 | 6E-03   |
| tyrosine phosphorylation of STAT protein                                                  | 4  | 0.24  | 16.67 | 6E-05   |
| tyrosine phosphorylation of Stat3 protein                                                 | 2  | 0.12  | 16.67 | 6E-03   |
| <b>negative regulation of protein metabolism</b>                                          | 6  | 1.36  | 4.41  | 2E-03   |
| regulation of phosphorus metabolism                                                       | 4  | 0.68  | 5.88  | 4E-03   |
| regulation of amino acid metabolism                                                       | 4  | 0.41  | 9.76  | 6E-04   |
| negative regulation of amino acid metabolism                                              | 2  | 0.1   | 20    | 3E-03   |
| negative regulation of protein amino acid phosphorylation                                 | 2  | 0.1   | 20    | 3E-03   |
| regulation of phosphate metabolism                                                        | 4  | 0.68  | 5.88  | 4E-03   |
| negative regulation of phosphate metabolism                                               | 2  | 0.15  | 13.33 | 8E-03   |
| negative regulation of phosphorylation                                                    | 2  | 0.15  | 13.33 | 8E-03   |
| negative regulation of peptidyl-tyrosine phosphorylation                                  | 2  | 0.1   | 20    | 3E-03   |
| regulation of phosphorylation                                                             | 4  | 0.61  | 6.56  | 3E-03   |
| peptidyl-amino acid modification                                                          | 5  | 1.19  | 4.2   | 6E-03   |
| peptidyl-tyrosine modification                                                            | 5  | 0.51  | 9.8   | 1E-04   |
| peptidyl-tyrosine phosphorylation                                                         | 4  | 0.46  | 8.7   | 1E-03   |
| regulation of protein amino acid phosphorylation                                          | 4  | 0.39  | 10.26 | 5E-04   |
| regulation of peptidyl-tyrosine phosphorylation                                           | 4  | 0.36  | 11.11 | 4E-04   |
| <b>organismal physiological process</b>                                                   | 61 | 35.54 | 1.72  | 6E-06   |
| <b>immune system process</b>                                                              | 38 | 12.02 | 3.16  | 1E-10   |
| antigen processing and presentation                                                       | 11 | 0.88  | 12.5  | 5E-10   |
| antigen processing and presentation of endogenous antigen                                 | 6  | 0.41  | 14.63 | 2E-06   |
| antigen processing and presentation of endogenous peptide antigen                         | 6  | 0.36  | 16.67 | 8E-07   |
| antigen processing and presentation of endogenous peptide antigen via MHC class I         | 6  | 0.36  | 16.67 | 8E-07   |
| antigen processing and presentation of exogenous antigen                                  | 5  | 0.27  | 18.52 | 3E-06   |
| antigen processing and presentation of exogenous peptide antigen                          | 5  | 0.27  | 18.52 | 3E-06   |
| antigen processing and presentation of exogenous peptide antigen via MHC class II         | 5  | 0.27  | 18.52 | 3E-06   |
| antigen processing and presentation of peptide antigen                                    | 11 | 0.68  | 16.18 | 2E-11   |
| antigen processing and presentation of peptide antigen via MHC class I                    | 6  | 0.36  | 16.67 | 8E-07   |
| antigen processing and presentation of peptide antigen via MHC class II                   | 5  | 0.27  | 18.52 | 3E-06   |
| antigen processing and presentation of peptide or polysaccharide antigen via MHC class II | 5  | 0.27  | 18.52 | 3E-06   |
| immune response                                                                           | 27 | 9.59  | 2.82  | 9E-07   |
| <b>response to stimulus</b>                                                               | 49 | 28.25 | 1.73  | 6E-05   |
| response to external stimulus                                                             | 20 | 9.49  | 2.11  | 1E-03   |
| response to stress                                                                        | 31 | 15.4  | 2.01  | 1E-04   |
| response to wounding                                                                      | 19 | 7.06  | 2.69  | 8E-05   |
| physiological response to stimulus                                                        | 47 | 22.38 | 2.1   | 5E-07   |
| physiological response to wounding                                                        | 19 | 6.81  | 2.79  | 5E-05   |
| physiological defense response                                                            | 16 | 7.18  | 2.23  | 2E-03   |
| inflammatory response                                                                     | 15 | 5.04  | 2.98  | 2E-04   |
| acute-phase response                                                                      | 4  | 0.58  | 6.9   | 2E-03   |
| response to biotic stimulus                                                               | 13 | 4.96  | 2.62  | 1E-03   |
| response to other organism                                                                | 12 | 4.01  | 2.99  | 7E-04   |
| response to virus                                                                         | 7  | 1.41  | 4.96  | 5E-04   |
| platelet activation                                                                       | 3  | 0.32  | 9.38  | 3E-03   |
| <b>carbohydrate biosynthesis</b>                                                          | 7  | 1.65  | 4.24  | 1E-03   |
| alcohol biosynthesis                                                                      | 4  | 0.51  | 7.84  | 1E-03   |
| monosaccharide biosynthesis                                                               | 4  | 0.51  | 7.84  | 1E-03   |
| hexose biosynthesis                                                                       | 4  | 0.51  | 7.84  | 1E-03   |
| fucose biosynthesis                                                                       | 2  | 0.05  | 40    | 6E-04   |
| L-fucose biosynthesis                                                                     | 2  | 0.05  | 40    | 6E-04   |
| GDP-L-fucose biosynthesis                                                                 | 2  | 0.05  | 40    | 6E-04   |
| de novo' GDP-L-fucose biosynthesis                                                        | 2  | 0.05  | 40    | 6E-04   |
| fucose metabolism                                                                         | 3  | 0.29  | 10.34 | 3E-03   |
| L-fucose metabolism                                                                       | 3  | 0.24  | 12.5  | 2E-03   |
| nucleotide-sugar biosynthesis                                                             | 3  | 0.07  | 42.86 | 1E-05   |
| nucleotide-sugar metabolism                                                               | 3  | 0.24  | 12.5  | 2E-03   |
| GDP-L-fucose metabolism                                                                   | 2  | 0.05  | 40    | 6E-04   |
| GDP-mannose metabolism                                                                    | 2  | 0.05  | 40    | 6E-04   |
| <b>developmental maturation</b>                                                           | 4  | 0.46  | 8.7   | 1E-03   |
| cell maturation                                                                           | 2  | 0.07  | 28.57 | 2E-03   |
| myeloid cell differentiation                                                              | 5  | 0.83  | 6.02  | 1E-03   |
| erythrocyte differentiation                                                               | 4  | 0.32  | 12.5  | 2E-04   |
| erythrocyte development                                                                   | 2  | 0.07  | 28.57 | 2E-03   |
| erythrocyte maturation                                                                    | 4  | 0.46  | 8.7   | 1E-03   |

|                                                  |    |       |       |       |
|--------------------------------------------------|----|-------|-------|-------|
| <b>anatomical structure development</b>          | 39 | 26.1  | 1.49  | 6E-03 |
| cell development                                 | 8  | 2.51  | 3.19  | 4E-03 |
| cellular morphogenesis during differentiation    | 5  | 1.05  | 4.76  | 4E-03 |
| cell projection morphogenesis                    | 5  | 0.97  | 5.15  | 3E-03 |
| neuron development                               | 5  | 1.24  | 4.03  | 8E-03 |
| neuron morphogenesis during differentiation      | 5  | 0.97  | 5.15  | 3E-03 |
| neurite development                              | 5  | 1.07  | 4.67  | 4E-03 |
| neurite morphogenesis                            | 5  | 0.97  | 5.15  | 3E-03 |
| axonogenesis                                     | 5  | 0.92  | 5.43  | 2E-03 |
| <b>cell adhesion</b>                             | 24 | 11.22 | 2.14  | 3E-04 |
| regulation of cell adhesion                      | 5  | 0.78  | 6.41  | 1E-03 |
| positive regulation of cell adhesion             | 2  | 0.1   | 20    | 3E-03 |
| <b>cell motility</b>                             | 14 | 4.79  | 2.92  | 3E-04 |
| cell migration                                   | 7  | 2.07  | 3.38  | 5E-03 |
| <b>locomotion</b>                                | 14 | 4.79  | 2.92  | 3E-04 |
| <b>cell proliferation</b>                        | 20 | 11.22 | 1.78  | 8E-03 |
| <b>phospholipid catabolism</b>                   | 2  | 0.15  | 13.33 | 8E-03 |
| <b>localization of cell</b>                      | 14 | 4.79  | 2.92  | 3E-04 |
| <b><i>In molecular function</i></b>              |    |       |       |       |
| <b>interferon binding</b>                        | 2  | 0.09  | 22.22 | 3E-03 |
| interferon receptor activity                     | 2  | 0.09  | 22.22 | 3E-03 |
| interferon-gamma receptor activity               | 2  | 0.05  | 40    | 6E-04 |
| interferon-gamma binding                         | 2  | 0.05  | 40    | 6E-04 |
| <b>obsolete molecular function</b>               | 11 | 0.61  | 18.03 | 5E-12 |
| MHC class I receptor activity                    | 6  | 0.38  | 15.79 | 1E-06 |
| MHC class II receptor activity                   | 6  | 0.26  | 23.08 | 7E-08 |
| <b>enzyme inhibitor activity</b>                 | 12 | 4.21  | 2.85  | 1E-03 |
| protease inhibitor activity                      | 7  | 2.26  | 3.1   | 7E-03 |
| endopeptidase inhibitor activity                 | 7  | 2.23  | 3.14  | 7E-03 |
| <b>glutathione peroxidase activity</b>           | 2  | 0.09  | 22.22 | 3E-03 |
| <b>erythropoietin receptor binding</b>           | 2  | 0.07  | 28.57 | 2E-03 |
| <b>selenium binding</b>                          | 2  | 0.12  | 16.67 | 5E-03 |
| <b>aldehyde dehydrogenase [NAD(P)+] activity</b> | 2  | 0.14  | 14.29 | 8E-03 |
