# Supplementary material
Source: PubMed Central journal article supplement (PMC2695248)
Supplement: halms340859-supplement_4.pdf [file halms340859-supplement_4.pdf]

**Supplementary Table S3. Classification of the main genes related to inflammation that are differentially expressed between inflammatory HCA and non-tumour livers.**

Data are expressed as the mean-fold difference in gene expression in inflammatory HCA (IHCA) relative to non-tumour livers (NTL). \*, \*\*, \*\*\* difference between groups at  $P < 0.05$ ; 0.01 and 0.001 respectively. Abbreviations: ns: not significant; nd: not done; na: not analysed.

| Gene Symbol                                                                   | Gene Name                                                                                | Microarray data                        |          | qRT-PCR validation                      |         |
|-------------------------------------------------------------------------------|------------------------------------------------------------------------------------------|----------------------------------------|----------|-----------------------------------------|---------|
|                                                                               |                                                                                          | Fold change ratio IHCA (n=4)/NTL (n=4) | P-value  | Fold change ratio IHCA (n=14)/NTL (n=6) | P-value |
| <b>Acute phase proteins</b>                                                   |                                                                                          |                                        |          |                                         |         |
| SAA1                                                                          | Serum amyloid A1                                                                         | 33.1                                   | 1.20E-04 | nd                                      |         |
| SAA2                                                                          | Serum amyloid A2                                                                         | na                                     | na       | 99.0                                    | ***     |
| SPINK1                                                                        | Serine protease inhibitor, Kazal type 1                                                  | 17.4                                   | 4.80E-04 | 75.2                                    | ***     |
| PLA2G2A                                                                       | Phospholipase A2, group IIA (platelets, synovial fluid)                                  | 15.2                                   | 1.00E-06 | nd                                      |         |
| VWF                                                                           | Von Willebrand factor                                                                    | 8.9                                    | 3.40E-04 | nd                                      |         |
| CRP                                                                           | C-reactive protein, pentraxin-related                                                    | 7.3                                    | 5.60E-04 | 21.6                                    | ***     |
| LBP                                                                           | Lipopolysaccharide binding protein                                                       | 3.7                                    | 1.50E-04 | nd                                      |         |
| SLPI                                                                          | Secretory leukocyte protease inhibitor (antileukoproteinase)                             | 2.9                                    | 3.50E-05 | nd                                      |         |
| GLRX                                                                          | Glutaredoxin (thioltransferase)                                                          | 2.3                                    | 1.40E-04 | nd                                      |         |
| IL1RN                                                                         | Interleukin 1 receptor antagonist                                                        | 2.1                                    | 1.80E-06 | nd                                      |         |
| FGB                                                                           | Fibrinogen, B beta polypeptide                                                           | 1.1                                    | ns       | 1.8                                     | **      |
| C4A                                                                           | Complement component 4B, telomeric                                                       | 1.6                                    | 1.10E-06 | nd                                      |         |
| TTR                                                                           | Transthyretin (prealbumin, amyloidosis type I)                                           | -2.0                                   | 1.20E-04 | nd                                      |         |
| IGF1                                                                          | Insulin-like growth factor 1 (somatomedin C)                                             | -2.4                                   | 8.70E-04 | nd                                      |         |
| ALB                                                                           | Albumin                                                                                  | -5.7                                   | 3.00E-11 | nd                                      |         |
| <b>MHC class I</b>                                                            |                                                                                          |                                        |          |                                         |         |
| HLA-A                                                                         | Major histocompatibility complex, class I, A                                             | 2.1                                    | 5.8E-04  | nd                                      |         |
| HLA-B                                                                         | Major histocompatibility complex, class I, B                                             | 3.0                                    | 6.3E-04  | nd                                      |         |
| HLA-C                                                                         | Major histocompatibility complex, class I, C                                             | 2.6                                    | 9.4E-04  | nd                                      |         |
| HLA-E                                                                         | Major histocompatibility complex, class I, E                                             | 2.1                                    | 4.9E-06  | 2.6                                     | ***     |
| HLA-F                                                                         | Major histocompatibility complex, class I, F                                             | 2.7                                    | 5.0E-04  | nd                                      |         |
| HLA-G                                                                         | HLA-G histocompatibility antigen, class I, G                                             | 2.8                                    | 8.9E-04  | nd                                      |         |
| <b>MHC class II</b>                                                           |                                                                                          |                                        |          |                                         |         |
| HLA-DMA                                                                       | Major histocompatibility complex, class II, DM alpha                                     | 2.6                                    | 8.2E-04  | nd                                      |         |
| HLA-DPA1                                                                      | Major histocompatibility complex, class II, DP alpha 1                                   | 2.8                                    | 6.3E-08  | nd                                      |         |
| HLA-DQB1                                                                      | Major histocompatibility complex, class II, DQ beta 1                                    | 2.5                                    | 2.3E-06  | nd                                      |         |
| HLA-DRA                                                                       | Major histocompatibility complex, class II, DR alpha                                     | 2.2                                    | 1.4E-07  | 4.1                                     | ***     |
| HLA-DRB1                                                                      | Major histocompatibility complex, class II, DR beta 4                                    | 2.3                                    | 2.8E-06  | nd                                      |         |
| <b>Antigen processing</b>                                                     |                                                                                          |                                        |          |                                         |         |
| TAP1                                                                          | Transporter 1, ATP-binding cassette, sub-family B (MDR/TAP)                              | 4.6                                    | 7.3E-04  | 4.1                                     | **      |
| PSMB8                                                                         | Proteasome (prosome, macropain) subunit, beta type, 8 (large multifunctional protease 7) | 2.2                                    | 7.2E-05  | 2.6                                     | **      |
| PSMB9                                                                         | Proteasome (prosome, macropain) subunit, beta type, 9 (large multifunctional protease 2) | 2.2                                    | 8.8E-04  | 3.5                                     | **      |
| CTSS                                                                          | Cathepsin S                                                                              | 2.4                                    | 8.1E-07  | nd                                      |         |
| <b>Cytokine and chemokines</b>                                                |                                                                                          |                                        |          |                                         |         |
| CCL20                                                                         | Chemokine (C-C motif) ligand 20                                                          | 219.8                                  | 3.7E-04  | nd                                      |         |
| NK4                                                                           | Interleukin 32                                                                           | 16.8                                   | 1.0E-04  | nd                                      |         |
| EPO                                                                           | Erythropoietin                                                                           | 6.8                                    | 2.1E-07  | nd                                      |         |
| TNFSF14                                                                       | Tumor necrosis factor (ligand) superfamily, member 14                                    | 4.3                                    | 5.9E-04  | nd                                      |         |
| PBEF1                                                                         | Pre-B-cell colony enhancing factor 1                                                     | 2.5                                    | 9.8E-04  | nd                                      |         |
| <b>Chemokine and toll-like receptors</b>                                      |                                                                                          |                                        |          |                                         |         |
| XCR1                                                                          | Chemokine (C motif) receptor 1                                                           | 3.0                                    | 1.4E-11  | nd                                      |         |
| TLR2                                                                          | Toll-like receptor 2                                                                     | 2.5                                    | 4.8E-04  | nd                                      |         |
| CCR1                                                                          | Chemokine (C-C motif) receptor 1                                                         | 2.3                                    | 5.0E-06  | nd                                      |         |
| <b>Cytokine receptors</b>                                                     |                                                                                          |                                        |          |                                         |         |
| IFNGR1                                                                        | Interferon gamma receptor 1                                                              | 2.6                                    | 3.0E-04  | 3.5                                     | ***     |
| IFNGR2                                                                        | Interferon gamma receptor 2 (interferon gamma transducer 1)                              | 1.9                                    | 4.6E-04  | 2.8                                     | ***     |
| IL4R                                                                          | Interleukin 4 receptor                                                                   | 2.1                                    | 2.7E-05  | nd                                      |         |
| TNFRSF11B                                                                     | Tumor necrosis factor receptor superfamily, member 11b (osteoprotegerin)                 | 2.0                                    | 5.8E-04  | nd                                      |         |
| IL1RAP                                                                        | Interleukin 1 receptor accessory protein                                                 | -2.3                                   | 2.7E-06  | nd                                      |         |
| SIGIRR                                                                        | Single Ig IL-1R-related molecule                                                         | -2.8                                   | 8.7E-04  | nd                                      |         |
| EPOR                                                                          | Erythropoietin receptor                                                                  | -5.9                                   | 2.2E-06  | nd                                      |         |
| <b>Transcription factors related to inflammation</b>                          |                                                                                          |                                        |          |                                         |         |
| IFI16                                                                         | Interferon, gamma-inducible protein 16                                                   | 4.2                                    | 3.2E-04  | nd                                      |         |
| STAT1                                                                         | Signal transducer and activator of transcription 1, 91kDa                                | 2.1                                    | ns       | 4.5                                     | ***     |
| STAT2                                                                         | Signal transducer and activator of transcription 2, 113kDa                               | 1.2                                    | ns       | 2.0                                     | *       |
| STAT3                                                                         | Signal transducer and activator of transcription 3 (acute-phase response factor)         | 2.8                                    | 2.8E-04  | 2.1                                     | ***     |
| HIF1A                                                                         | Hypoxia-inducible factor 1, alpha subunit (basic helix-loop-helix transcription factor)  | 2.5                                    | 6.8E-04  | 3.5                                     | ***     |
| ISGF3G                                                                        | Interferon-stimulated transcription factor 3, gamma 48kDa                                | 2.2                                    | 7.4E-07  | 2.1                                     | **      |
| NFKB2                                                                         | Nuclear factor of kappa light polypeptide gene enhancer in B-cells 2 (p49/p100)          | 2.1                                    | 1.0E-04  | 2.2                                     | **      |
| IRF7                                                                          | Interferon regulatory factor 7                                                           | 2.0                                    | 2.3E-06  | 2.8                                     | **      |
| HCLS1                                                                         | Hematopoietic cell-specific Lyn substrate 1                                              | 1.9                                    | 1.1E-05  | nd                                      |         |
| <b>Other proteins involved in signal transduction related to inflammation</b> |                                                                                          |                                        |          |                                         |         |
| JAK2                                                                          | Janus kinase 2 (a protein tyrosine kinase)                                               | 1.1                                    | ns       | 2.0                                     | **      |
| GOLPH2                                                                        | Golgi phosphoprotein 2                                                                   | 129.0                                  | 3.1E-05  | nd                                      |         |
| SOCS1                                                                         | Suppressor of cytokine signaling 1                                                       | 9.8                                    | 2.8E-04  | 17.4                                    | ***     |
| SOCS3                                                                         | Suppressor of cytokine signaling 3                                                       | 1.5                                    | ns       | 2.1                                     | *       |
| BIRC3                                                                         | Baculoviral IAP repeat-containing 3                                                      | 9.1                                    | 2.7E-05  | 7.6                                     | ***     |
| BCL2A1                                                                        | BCL2-related protein A1                                                                  | 5.9                                    | 4.3E-04  | 17.2                                    | ***     |
| TNFAIP8                                                                       | Tumor necrosis factor, alpha-induced protein 8                                           | 4.1                                    | 5.4E-04  | nd                                      |         |
| GBP2                                                                          | Guanylate binding protein 2, interferon-inducible                                        | 3.8                                    | 1.2E-04  | nd                                      |         |
| PLA2G4C                                                                       | Phospholipase A2, group IVC (cytosolic, calcium-independent)                             | 3.4                                    | 3.4E-07  | nd                                      |         |
| C5R1                                                                          | Complement component 5 receptor 1 (C5a ligand)                                           | 3.1                                    | 9.0E-04  | nd                                      |         |
| PTGES2                                                                        | Prostaglandin E synthase 2                                                               | 2.3                                    | 1.3E-09  | nd                                      |         |
| IFITM1                                                                        | Interferon induced transmembrane protein 1 (9-27)                                        | 2.2                                    | 1.1E-09  | nd                                      |         |
| TNFAIP3                                                                       | Tumor necrosis factor, alpha-induced protein 3                                           | 2.2                                    | 6.2E-04  | nd                                      |         |
| IFI35                                                                         | Interferon-induced protein 35                                                            | -2.0                                   | 7.5E-08  | nd                                      |         |
| SOCS2                                                                         | Suppressor of cytokine signaling 2                                                       | -4.3                                   | 1.9E-12  | nd                                      |         |
