# Supplementary material
Source: PubMed Central journal article supplement (PMC2695248)
Supplement: halms340859-supplement_5.pdf [file halms340859-supplement_5.pdf]

## Supplementary Table S4. *IL6ST*, *HNF1A* and *CTNNB1* gene mutations

Abbreviations: del: deletion; fs: frameshift; ins: insertion; nm: non-mutated; IHCA: inflammatory hepatocellular adenoma; HCA: hepatocellular adenoma; HCC: hepatocellular carcinoma

#469T: HCC associated with an IHCA (470T)

\* Previously described in Zucman-Rossi *et al.* 2006; \*\* and the remaining 111 HCC were previously described in Boyault *et al.* 2007

| N° ID | Sexe | Age | Diagnosis | <i>IL6ST</i> mutations                  | <i>HNF1A</i> mutations |                           | <i>CTNNB1</i> mutations   |
|-------|------|-----|-----------|-----------------------------------------|------------------------|---------------------------|---------------------------|
|       |      |     |           |                                         | Allele 1               | Allele 2                  |                           |
| 344T  | F    | 38  | IHCA      | 560_571del; S187_Y190del                | nm                     | nm                        | nm                        |
| 362T  | F    | 54  | IHCA      | 560_571del; S187_Y190del                | nm                     | nm                        | nm                        |
| 364T  | F    | 35  | IHCA      | 565_576del; V189_V192del                | nm                     | nm                        | nm                        |
| 377T  | F    | 42  | IHCA      | 565_576del; V189_V192del                | nm                     | nm                        | nm                        |
| 382T  | F    | 40  | IHCA      | 560_571del; S187_Y190del                | nm                     | nm                        | nm                        |
| 390T  | M    | 50  | IHCA      | 557_574del; Y186_F191del, V192F         | nm                     | nm                        | nm                        |
| 455T  | F    | 27  | IHCA      | 565_576del; V189_V192del                | nm                     | nm                        | nm                        |
| 466T  | F    | 50  | IHCA      | 560_571del; S187_Y190del                | nm                     | nm                        | nm                        |
| 552T  | F    | 55  | IHCA      | 563_574del; T188_F191del, V192I         | nm                     | nm                        | nm                        |
| 555T  | F    | 40  | IHCA      | 503_580del; K168_N192del                | nm                     | nm                        | nm                        |
| 560T  | F    | 49  | IHCA      | 557_571del; Y186_Y190del                | nm                     | nm                        | nm                        |
| 670T  | F    | 37  | IHCA      | 560_571del; S187_Y190del                | nm                     | nm                        | nm                        |
| 691T  | F    | 35  | IHCA      | 518_532del; K173_D177del                | nm                     | nm                        | nm                        |
| 770T  | F    | 34  | IHCA      | 559_573del; S187_F191del                | nm                     | nm                        | nm                        |
| 771T  | F    | 33  | IHCA      | 564_575del; T188_F191del, V192T         | nm                     | nm                        | nm                        |
| 867T  | F    | 38  | IHCA      | 583-588del; E195_V196del                | nm                     | nm                        | nm                        |
| 1020T | F    | 40  | IHCA      | 557_571del; Y186_Y190del                | nm                     | nm                        | nm                        |
| 1121T | F    | 25  | IHCA      | 557_571del; Y186_Y190del                | nm                     | nm                        | nm                        |
| 1232T | F    | 36  | IHCA      | 563_574del; T188_F191del, V192I         | nm                     | nm                        | nm                        |
| 1238T | F    | 41  | IHCA      | 573T>G, 574_582del; F191L, V192_I194del | nm                     | nm                        | nm                        |
| 470T  | F    | 32  | IHCA      | 557_571del; Y186_Y190del                | nm                     | nm                        | *100G>A; G34R             |
| 711T  | F    | 26  | IHCA      | 643_645del; D215del                     | nm                     | nm                        | 121A>G; T41A              |
| 786T  | M    | 59  | IHCA      | 551_559del; V184_Y186del, S187A         | nm                     | nm                        | IVS2+9_399del; A5_K133del |
| 819T  | F    | 46  | IHCA      | 560_571del; S187_Y190del                | nm                     | nm                        | 116C>G; A39G              |
| 1023T | M    | 35  | IHCA      | 614_646dup; K206_P216dup, G205R         | nm                     | nm                        | 121A>G; T41A              |
| 1124T | M    | 50  | IHCA      | 575_583del; V192_I194del                | nm                     | nm                        | 121A>G; T41A              |
| 343T  | F    | 45  | IHCA      | nm                                      | nm                     | nm                        | 134C>A; S45Y              |
| 1234T | F    | 21  | IHCA      | nm                                      | nm                     | nm                        | 133T>C; S45P              |
| 222T  | M    | 29  | IHCA      | nm                                      | nm                     | nm                        | nm                        |
| 341T  | M    | 43  | IHCA      | nm                                      | nm                     | nm                        | nm                        |
| 346T  | F    | 38  | IHCA      | nm                                      | nm                     | nm                        | nm                        |
| 353T  | F    | 27  | IHCA      | nm                                      | nm                     | nm                        | nm                        |
| 375T  | F    | 46  | IHCA      | nm                                      | nm                     | nm                        | nm                        |
| 378T  | F    | 51  | IHCA      | nm                                      | nm                     | nm                        | nm                        |
| 379T  | F    | 46  | IHCA      | nm                                      | nm                     | nm                        | nm                        |
| 458T  | F    | 25  | IHCA      | nm                                      | nm                     | nm                        | nm                        |
| 471T  | F    | 31  | IHCA      | nm                                      | nm                     | nm                        | nm                        |
| 574T  | M    | 55  | IHCA      | nm                                      | nm                     | nm                        | nm                        |
| 622T  | F    | 31  | IHCA      | nm                                      | nm                     | nm                        | nm                        |
| 781T  | F    | 39  | IHCA      | nm                                      | nm                     | nm                        | nm                        |
| 873T  | M    | 33  | IHCA      | nm                                      | nm                     | nm                        | nm                        |
| 1123T | F    | 46  | IHCA      | nm                                      | nm                     | nm                        | nm                        |
| 1215T | F    | 33  | IHCA      | nm                                      | nm                     | nm                        | nm                        |
| 372T  | F    | 37  | HCA       | nm                                      | nm                     | nm                        | *101G>A; G34E             |
| 376T  | M    | 14  | HCA       | nm                                      | nm                     | nm                        | *98C>T; S33Y              |
| 517T  | F    | 28  | HCA       | nm                                      | nm                     | nm                        | *133T>C; S45P             |
| 361T  | F    | 67  | HCA       | nm                                      | nm                     | nm                        | *7_378del; T3_A126del     |
| 1214T | F    | 32  | HCA       | nm                                      | IVS3-85_753del         | 1894del13bp + dup11bp     | nm                        |
| 357T  | F    | 28  | HCA       | nm                                      | *IVS2+1G>A             | *618G>T; W206C            | nm                        |
| 358T  | F    | 46  | HCA       | nm                                      | *617G>T; W206L         | *872_884del; P291fs       | nm                        |
| 368T  | F    | 49  | HCA       | nm                                      | *710A>G; N237S         | *LOH                      | nm                        |
| 369T  | F    | 41  | HCA       | nm                                      | *436_437delC; Q146fs   | *LOH                      | nm                        |
| 370T  | F    | 49  | HCA       | nm                                      | *872_873insC; P291fs   | *803T>G; F268C            | nm                        |
| 371T  | F    | 37  | HCA       | nm                                      | *617G>T; W206L         | *730A>G; R244G            | nm                        |
| 373T  | F    | 35  | HCA       | nm                                      | *82C>T; Q28X           | *LOH                      | nm                        |
| 380T  | F    | 27  | HCA       | nm                                      | *196G>T; E66X          | *779C>T; T260M            | nm                        |
| 383T  | F    | 30  | HCA       | nm                                      | *493T>A; W165R         | *1340C>T; P447L           | nm                        |
| 385T  | F    | 38  | HCA       | nm                                      | *817A>G; K273E         | *LOH                      | nm                        |
| 387T  | F    | 51  | HCA       | nm                                      | 1326G>A; Q442Q         | LOH                       | nm                        |
| 461T  | F    | 41  | HCA       | nm                                      | *872_873insC; P291fs   | *872_873delC; P291fs      | nm                        |
| 462T  | F    | 34  | HCA       | nm                                      | *632A>C; Q211P         | *617G>T; W206L            | nm                        |
| 464T  | F    | 51  | HCA       | nm                                      | *71_82del; A25_Q28del  | *747_764del; Q250_G255del | nm                        |
| 516T  | M    | 67  | HCA       | nm                                      | *185_194del; N62fs     | *788G>A; R263H            | nm                        |
| 575T  | F    | 33  | HCA       | nm                                      | *IVS2+1del13           | *956_957delG; G319fs      | nm                        |
| 687T  | F    | 24  | HCA       | nm                                      | *814C>A; R272S         | *LOH                      | nm                        |
| 694T  | F    | 45  | HCA       | nm                                      | *682G>T; E228X         | *IVS2_2 A>G               | nm                        |
| 759T  | F    | 56  | HCA       | nm                                      | IVS2+1 G>A             | 608G>T; R203L             | nm                        |
| 766T  | F    | 26  | HCA       | nm                                      | IVS2+1 G>A             | 872_873insC; P291fs       | nm                        |
| 817T  | F    | 42  | HCA       | nm                                      | 196G>T; E66X           | 711T>A; N237K             | nm                        |
| 342T  | F    | 34  | HCA       | nm                                      | nm                     | nm                        | nm                        |
| 452T  | M    | 18  | HCA       | nm                                      | nm                     | nm                        | nm                        |
| 459T  | F    | 41  | HCA       | nm                                      | nm                     | nm                        | nm                        |
| 573T  | F    | 28  | HCA       | nm                                      | nm                     | nm                        | nm                        |
| 603T  | F    | 48  | HCA       | nm                                      | nm                     | nm                        | nm                        |
| 674T  | F    | 24  | HCA       | nm                                      | nm                     | nm                        | nm                        |
| 706T  | M    | 52  | HCA       | nm                                      | nm                     | nm                        | nm                        |
| 469T# | F    | 32  | HCC       | 557_571del; Y186_Y190del                | nm                     | nm                        | *100G>A; G34R             |
| 059T  | M    | 40  | HCC       | 577_579del, 580A>T; N193del, I194F      | nm                     | nm                        | **121A>G; T41A            |
| 199T  | M    | 75  | HCC       | 569_577del, 578A>C; Y190_V192del, N193S | nm                     | nm                        | **101G>T; G34V            |
