# Supplementary material
Source: PubMed Central journal article supplement (PMC2695248)
Supplement: halms340859-supplement_6.pdf [file halms340859-supplement_6.pdf]

**Supplementary Table S5. TaqMan® pre-designed gene expression assays used for quantitative RT-PCR analyses**

| Assay ID      | Gene Symbol | Gene Name                                                                                 |
|---------------|-------------|-------------------------------------------------------------------------------------------|
| Hs99999901_s1 | 18S         | Eukaryotic 18S rRNA                                                                       |
| Hs00187845_m1 | BCL2A1      | BCL2-related protein A1                                                                   |
| Hs00154109_m1 | BIRC3       | baculoviral IAP repeat-containing 3                                                       |
| Hs00355476_m1 | CCL20       | chemokine (C-C motif) ligand 20                                                           |
| Hs00265044_m1 | CRP         | C-reactive protein, pentraxin-related                                                     |
| Hs00170586_m1 | FGB         | fibrinogen beta chain                                                                     |
| Hs00153153_m1 | HIF1A       | hypoxia-inducible factor 1, alpha subunit (basic helix-loop-helix transcription factor)   |
| Hs00219575_m1 | HLA-DRA     | major histocompatibility complex, class II, DR alpha                                      |
| Hs00428366_m1 | HLA-E       | major histocompatibility complex, class I, E                                              |
| Hs00166223_m1 | IFNGR1      | interferon gamma receptor 1                                                               |
| Hs00194264_m1 | IFNGR2      | interferon gamma receptor 2 (interferon gamma transducer 1)                               |
| Hs00174148_m1 | IL11        | interleukin 11                                                                            |
| Hs00234415_m1 | IL11RA      | interleukin 11 receptor, alpha                                                            |
| Hs00992441_m1 | IL32        | interleukin 32                                                                            |
| Hs00174360_m1 | IL6ST       | interleukin 6 signal transducer (gp130, oncostatin M receptor)                            |
| Hs00185375_m1 | IRF7        | interferon regulatory factor 7                                                            |
| Hs00196051_m1 | ISGF3G      | interferon-stimulated transcription factor 3, gamma 48kDa                                 |
| Hs00234567_m1 | JAK2        | Janus kinase 2 (a protein tyrosine kinase)                                                |
| Hs00544758_m1 | PSMB8       | proteasome (prosome, macropain) subunit, beta type, 8 (large multifunctional peptidase 7) |
| Hs00544762_m1 | PSMB9       | proteasome (prosome, macropain) subunit, beta type, 9 (large multifunctional peptidase 2) |
| Hs01667582_m1 | SAA2        | serum amyloid A2                                                                          |
| Hs00705164_s1 | SOCS1       | suppressor of cytokine signaling 1                                                        |
| Hs00269575_s1 | SOCS3       | suppressor of cytokine signaling 3                                                        |
| Hs00162154_m1 | SPINK1      | serine peptidase inhibitor, Kazal type 1                                                  |
| Hs00234829_m1 | STAT1       | signal transducer and activator of transcription 1, 91kDa                                 |
| Hs00237139_m1 | STAT2       | signal transducer and activator of transcription 2, 113kDa                                |
| Hs00374280_m1 | STAT3       | signal transducer and activator of transcription 3 (acute-phase response factor)          |
| Hs00388682_m1 | TAP1        | transporter 1, ATP-binding cassette, sub-family B (MDR/TAP)                               |
