# Supplementary material
Source: PubMed Central journal article supplement (PMC2695248)
Supplement: halms340859-supplement_7.pdf [file halms340859-supplement_7.pdf]

## Supplementary Table S6. List of primers used in PCR and sequencing

F: forward primer; R: reverse primer

| Exon                                                  | Sequence primer 5'->3'       | Primer Name    |
|-------------------------------------------------------|------------------------------|----------------|
| <b>IL6ST genomic DNA amplification and sequencing</b> |                              |                |
| 3                                                     | CACAGCTACAGCATGGAAACA        | 3F-IL6ST       |
|                                                       | GCATGTAAGATGACTGTTACAACCTCAA | 3R-IL6ST       |
| 4                                                     | TGACGGTTGAGGGACTCTACA        | 4F-IL6ST       |
|                                                       | GCAGTTCAATAGTCATGACAAAGTC    | 4R-IL6ST       |
| 5                                                     | CGCAAATGCCTTGGGTAGTA         | 5F-IL6ST       |
|                                                       | AAAAATCCAGCAAAAATGACT        | 5R-IL6ST       |
| 6                                                     | TAGTGACCAGCAGTTATATTGCAA     | 6F-IL6ST       |
|                                                       | CGACTACAGTGTCAAATAAACTCTCA   | 6R-IL6ST       |
| 7                                                     | TTGGAAAACATAATAAACCTTAGGA    | 7F-IL6ST       |
|                                                       | GGGTTGAAAGAAGGACTATTTGA      | 7R-IL6ST       |
| 8                                                     | TGTTTGGTTTGCTTTGTTTCA        | 8F-IL6ST       |
|                                                       | TCACAAACTAAGAAGCAATGAGG      | 8R-IL6ST       |
| 9                                                     | GCAATTGGAGGGCAAGAGTA         | 9F-IL6ST       |
|                                                       | AATGGAGCGAGACTCGGTTT         | 9R-IL6ST       |
| 10                                                    | AGAGATTTGACATAATGGCATG       | 10F-IL6ST      |
|                                                       | GTGTTTTTATGGGAGCCCTG         | 10R-IL6ST      |
| 11                                                    | TCACATGTTTTGGAAATGACTG       | 11F-IL6ST      |
|                                                       | AGTCGTTTCAACGGACCAAA         | 11R-IL6ST      |
| 12-13                                                 | TGCAGTTTTAAAAGAAAATTAAGTGG   | 12/13F-IL6ST   |
|                                                       | GGTGTCCTCGAGGCCAATA          | 12/13R-IL6ST   |
| 14                                                    | CAATGCCAAATATAGGCCAAA        | 14F-IL6ST      |
|                                                       | CCACCAACCAAGCCAGATA          | 14R-IL6ST      |
| 15                                                    | CAGTAAGTCTGGTTGGGAAGTTG      | 15F-IL6ST      |
|                                                       | TTGGGCTGAGAAGAAGACAGA        | 15R-IL6ST      |
| 16                                                    | TGGTTTGGTTTGTAAAGAGCTTTG     | 16F-IL6ST      |
|                                                       | TTCAGCTTGAATATCTTATCTTT      | 16R-IL6ST      |
| 17                                                    | CTGGGAAGTTTCAGAGATGC         | 17F-IL6ST      |
|                                                       | CTTGCCGTACAGTCTGTGGT         | 17R-IL6ST      |
| <b>IL6ST cDNA amplification and sequencing</b>        |                              |                |
| 3-7                                                   | ACCCAATGGAAAAAGCATGA         | 3F.RT-IL6ST    |
|                                                       | TGCTGTGTCTTCAGGAGGAA         | 7R.RT-IL6ST    |
| 7-11                                                  | AGAAGCAGAGAATGCCCTTG         | 7F.RT-IL6ST    |
|                                                       | CCTCTTAAATAGGTGCGATGC        | 11R.RT-IL6ST   |
| 11-15                                                 | TCACAAGATGGAATCACAT          | 11F.RT-IL6ST   |
|                                                       | TGACCACTGGGCAATATGAC         | 15R.RT-IL6ST   |
| 16-17                                                 | TTCTGCTTAAATAAGCGAGACC       | 16F.RT-IL6ST   |
|                                                       | GGGCAATGATCATCTTCAGAG        | 17R.RT-IL6ST   |
| <b>IL6ST cDNA sequencing</b>                          |                              |                |
| 3-7                                                   | GAACAGCATCCAGTGTCC           | 3FintRT-IL6ST  |
|                                                       | GTTTTGCTTTGCAATCA            | 7RintRT-IL6ST  |
| 7-11                                                  | GCTGTATGAAGGAAGATG           | 7FintRT-IL6ST  |
|                                                       | TCAGTTTTGTGGCATTAACTGTG      | 11RintRT-IL6ST |
| 11-15                                                 | AGACTGGCAACAAGAAGA           | 11FintRT-IL6ST |
|                                                       | CTGTGTATGCTGCCATT            | 15RintRT-IL6ST |
| 16-17                                                 | GACCTGTTCAAAAAGGAAA          | 16FintRT-IL6ST |
|                                                       | ATCAGTCGCAGCCTCCAT           | 17RintRT-IL6ST |
| <b>IL6R cDNA amplification and sequencing</b>         |                              |                |
| 1-5                                                   | GGCTCCTGCGGATGGGGCC          | 5'UTRF.RT-IL6R |
|                                                       | GGGTCTTGCCAGGTGACAC          | 703R.RT-IL6R   |
| 4-10                                                  | CCAGTAGTGTCGGGAGCAA          | 583F.RT-IL6R   |
|                                                       | CATCTTTTGCTGAGCCCGT          | 3'UTRR.RT-IL6R |
| <b>IL6R cDNA sequencing</b>                           |                              |                |
| 1-5                                                   | GAGGAGCCCCAGCTCTCC           | 342F-IL6R      |
| 1-3                                                   | CTCACCAAGAGCACAGCC           | 434R-IL6R      |
| 9-10                                                  | CGACAAGCCTCCAGTGC            | 1051F-IL6R     |
| 5-10                                                  | AGTACGGCGGATGCATGC           | 1207R-IL6R     |
| <b>LIFR cDNA amplification and sequencing</b>         |                              |                |
| 1-6                                                   | AAGGTGAGCCTTCAGAACAATC       | 5'UTRF.RT-LIFR |
|                                                       | GCAGTTTGTATGGCCAATCAGT       | 6R.RT-LIFR     |
| 6-10                                                  | AGGTTTTTCTCAAGATAAAGTGA      | 6F.RT-LIFR     |
|                                                       | CTTTGAAGGACTGGCTTCTG         | 10R.RT-LIFR    |
| 10-15                                                 | TTTCGGATTTCGTTGTCTACTGA      | 10F.RT-LIFR    |
|                                                       | TTCTTAACTTTTTATGTCAGAACGACCT | 15R.RT-LIFR    |
| 15-19                                                 | GGGAAGACATTCCTGTGGA          | 15F.RT-LIFR    |
|                                                       | CCCCTCCTACAGGTCATTT          | 19R.RT-LIFR    |
| 19                                                    | GGGACTGCACAGGTTATTTACA       | 19F.RT-LIFR    |
|                                                       | CACATGAGAAAACCACAAACA        | 3'UTRR.RT-LIFR |

| <b>LIFR cDNA sequencing</b>                           |                             |                  |
|-------------------------------------------------------|-----------------------------|------------------|
| 1-6                                                   | AAAACAGGTCCCGTTCTTGTTATCA   | 5'UTRintFRT-LIFR |
|                                                       | GTCTGAGCCTACAAGTATCAC       | 6RintRT-LIFR     |
| 6-10                                                  | TCTTGGCATTACCAGGCAACT       | 6FintRT-LIFR     |
|                                                       | TCCTCATCTGATGAACACGAT       | 10RintRT-LIFR    |
| 10-15                                                 | CGCTCCATGATTGGATATATAG      | 10FintRT-LIFR    |
|                                                       | GGTTTTCAGGCTCTGCATCAGA      | 15RintRT-LIFR    |
| 19                                                    | TTACAGACCTCAGGCCAATG        | 19FintRT-LIFR    |
| <b>OSMR cDNA amplification and sequencing</b>         |                             |                  |
| 1-4                                                   | TGGATACAGGGAAGGAGAA         | 3'UTRF.RT-OSMR   |
|                                                       | GTCCTCAAGTACTTTTGAGACAA     | 4R.RT-OSMR       |
| 4-10                                                  | GGAAGGAAACAGATTCATG         | 4F.RT-OSMR       |
|                                                       | TGGATGGTTTGTCTAGGTTTT       | 10R.RT-OSMR      |
| 8-14                                                  | TGGAGTGAATGGAGTGGTCA        | 8F.RT-OSMR       |
|                                                       | TGAATCAGCATCGAGGAGT         | 14R.RT-OSMR      |
| 14-17                                                 | CAAATGACAACCCGGAAG          | 14F.RT-OSMR      |
|                                                       | GTGCCAGCTCTGCTTCTT          | 5'UTRR.RT-OSMR   |
| <b>SOCS3 genomic DNA amplification and sequencing</b> |                             |                  |
| 2                                                     | AGGGTTCGGGCACTCAA           | 2F-SOCS3         |
|                                                       | TTCTTGTGCTTGCCATGT          | 2R-SOCS3         |
| <b>JAK1 genomic DNA amplification and sequencing</b>  |                             |                  |
| 11                                                    | CAGCAGACGTTGGCTGTC          | 11F-JAK1         |
|                                                       | CCCCAAGCTGCTCCATC           | 11R-JAK1         |
| 12                                                    | ATTGAGGACCCATTCCCAG         | 12F-JAK1         |
|                                                       | GTTCCACTGGCTCCAGAAAC        | 12R-JAK1         |
| 13                                                    | CTGGCTTCCCTCAACAG           | 13F-JAK1         |
|                                                       | ACAGCACCAAGTCCC             | 13R-JAK1         |
| 14                                                    | CTGTCGTAAGGGGATGAAGG        | 14F-JAK1         |
|                                                       | TCCCAGGACACTCTGGTTTC        | 14R-JAK1         |
| 15                                                    | GGGACCAGGTTGGAAATAG         | 15F-JAK1         |
|                                                       | CAGCCCTTCTCTGCTGAC          | 15R-JAK1         |
| 16                                                    | TCACTGTTCTGGCTGCAGTG        | 16F-JAK1         |
|                                                       | ACAACCTCTGGGAAGCCC          | 16R-JAK1         |
| 17-18                                                 | GGGGCTGAGAAGTTGTAGG         | 17/18F-JAK1      |
|                                                       | TACGTGCAGAGAGTGGCG          | 17/18R-JAK1      |
| 19                                                    | GACTTCTGTGTGTTCCGTGG        | 19F-JAK1         |
|                                                       | TTGCACTGGCCTTATGACC         | 19R-JAK1         |
| 20                                                    | CTTGCTCTCCCATGGTTC          | 20F-JAK1         |
|                                                       | CAAACCAATTACCCAGGACAG       | 20R-JAK1         |
| 21                                                    | TCTGCATTATTTAGATGAAAAGTTAGC | 21F-JAK1         |
|                                                       | TCAGGCCAGAGGAATGAGAC        | 21R-JAK1         |
| 22                                                    | TCCTGTAATGTCGGATGGAG        | 22F-JAK1         |
|                                                       | TTAACCAAGCAGAGGGATGG        | 22R-JAK1         |
| 23                                                    | ATTTACCTTAATCTGTTTGGC       | 23F-JAK1         |
|                                                       | CAACTCAAGCTGCGAAAAC         | 23R-JAK1         |
| 24                                                    | TGAACTAGAGTTGTATCCCATTTTC   | 24F-JAK1         |
|                                                       | ACTTGGGCATTTGTTGCAG         | 24R-JAK1         |
| <b>JAK2 genomic DNA amplification and sequencing</b>  |                             |                  |
| 12                                                    | CAAAGTTCAATGAGTTGACCCC      | 12F-JAK2         |
|                                                       | TGCTAACATCTAACACAAGGTTGG    | 12R-JAK2         |
| 13                                                    | TGTATTTTCTTGTTCTACTTCGTTTC  | 13F-JAK2         |
|                                                       | TTACAATTTTAAAAGCTGCAC       | 13R-JAK2         |
| 14                                                    | GAGAAAGTGCATCTTTATTATGGC    | 14F-JAK2         |
|                                                       | CTGACACCTAGCTGTGATCCTG      | 14R-JAK2         |
| 15                                                    | TGTTTAGACTCCTACTTTGCTGTTG   | 15F-JAK2         |
|                                                       | CACAGACTATTTTACATGAATTGGC   | 15R-JAK2         |
| 16                                                    | TTCTTCTTAAATCTGTTTGGGG      | 16F-JAK2         |
|                                                       | CCTTTACACCACTGCCCAAG        | 16R-JAK2         |
| 17-18                                                 | CCCCTCCAAAATAAAGAAAATAGG    | 17/18F-JAK2      |
|                                                       | AGGGCCCAAATGACATCAAG        | 17/18R-JAK2      |
| 19                                                    | GACCAGTGTGGTGCGGG           | 19R-JAK2         |
|                                                       | GAAGGCCTGTCAGATTATGGG       | 19F-JAK2         |
| 20                                                    | TTTATTTGTAATTTGCCTTGAAAAC   | 20F-JAK2         |
|                                                       | TTACACAGGATGCCAAACAC        | 20R-JAK2         |
| 21-22                                                 | CCCACGTGGACTATAACCATGAC     | 21/22R-JAK2      |
|                                                       | CTGAAACGCAAATAGTTTCAAAGC    | 21/22F-JAK2      |
| 23                                                    | GTAGATGTCAGCATAAACCGTATTG   | 23F-JAK2         |
|                                                       | GCCATTGGTGGAGTAGATGC        | 23R-JAK2         |
| 24-25                                                 | CCATTGACTGGAGGAAATTGAG      | 24/25F-JAK2      |
|                                                       | TCCACAGCAATGTGAAATATAAAAC   | 24/25R-JAK2      |

| <b>TYK2 genomic DNA amplification and sequencing</b> |                        |             |
|------------------------------------------------------|------------------------|-------------|
| 12-13                                                | GTGGGATGTGGCATCTCTCC   | 12/13F-TYK2 |
|                                                      | CCACAGACACACCCCTCC     | 12/13R-TYK2 |
| 14                                                   | GTGTCCGTGGAGGAGGTG     | 14F-TYK2    |
|                                                      | GGAGTGGGTATAAGTCAGGGG  | 14R-TYK2    |
| 15                                                   | ACATGCCAAGTCCCTCCC     | 15F-TYK2    |
|                                                      | TCTCGAACTCCTGGGCTCC    | 15R-TYK2    |
| 16-17                                                | GAGCTCTGATTCTGTCCTCTGG | 17R-TYK2    |
|                                                      | GTTGTCCTTTTCACATTGGCTG | 16F-TYK2    |
| 18                                                   | CTGCCTCTTGGGGAACG      | 18F-TYK2    |
|                                                      | GCTATAGGCATACAGCAGGG   | 18R-TYK2    |
| 19                                                   | TTTGTGACTCCCAAGTGTGG   | 19F-TYK2    |
|                                                      | CCAAACTCCTTCCCGACC     | 19R-TYK2    |
| 20                                                   | GAGTGGTGCAGGGATTGG     | 20F-TYK2    |
|                                                      | CACAAGGCCACACCCAC      | 20R-TYK2    |
| 21                                                   | CTCTGCTGGGCTCAAGGTAG   | 21F-TYK2    |
|                                                      | CAGCCCAAGCTGAAGAGG     | 21R-TYK2    |
| 22                                                   | GCTGCTCAGGTCCTGCC      | 22F-TYK2    |
|                                                      | CTACTCCACCCTGCCTGTTT   | 22R-TYK2    |
| 23                                                   | GTCTCAGGTGAGGGCTTCAG   | 23F-TYK2    |
|                                                      | TCTCTCCGTCTGTCCTGTC    | 23R-TYK2    |
| 24-25                                                | CGTGCCTGCCTTTTCATTG    | 24/25F-TYK2 |
|                                                      | TTGGTTTCATCCTGGAGCAG   | 24/25R-TYK2 |
| <b>TYK2 genomic DNA sequencing</b>                   |                        |             |
| 22                                                   | CGAACCCCGCCCCACTGA     | 22F-TYK2    |
|                                                      | CCAAGTGACCCAGCACC      | 22R-TYK2    |
